# Supplementary material for: Identification of a Homozygous Nonsense Variant in KCTD19 Causing Meiotic Arrest and Non-obstructive Azoospermia in Humans
Source: Research Square preprint supplement (doi:10.21203/rs.3.rs-7475505/v1), 2025-09-09
Supplement: Supplementary file 1 [file 48866bca512030d67c7a9287.docx]

| Supplementary Table S1. The sequences of *KCTD19* gene primers | | | |
| --- | --- | --- | --- |
| Propose | Primer sequences (5’→3’) |  |  |
| Sanger sequencing | F: TGCACAACTGGAGAAGGAGA | | |
|  | R: TTAGGAGGAGTCTGGCATGG | | |
| Mutant plasmid construction | F: CGAGCTCGGATCCGCCACCATGGAGGAGTCTGGCATGGC | | |
|  | R:AATCACCGTCATGGTCTTTGTAGTCCTCGAGGTCCTCTTGTAGGTACTTTC |  |  |
